1 **Genomic, transcriptomic and phenomic variation reveals the**  
2 **complex adaptation of modern maize breeding**

3

4 Haijun Liu<sup>a,1</sup>, Xiaqing Wang<sup>a,1</sup>, Marilyn L. Warburton<sup>b</sup>, Weiwei Wen<sup>a</sup>, Minliang Jin<sup>a</sup>,  
5 Min Deng<sup>a</sup>, Jie Liu<sup>a</sup>, Hao Tong<sup>a</sup>, Qingchun Pan<sup>a</sup>, Xiaohong Yang<sup>c</sup>, Jianbing Yan<sup>a,2</sup>

6

7 <sup>a</sup>National Key Laboratory of Crop Genetic Improvement, Huazhong Agricultural  
8 University, Wuhan 430070, China.

9 <sup>b</sup>United States Department of Agriculture-Agricultural Research Service: Corn Host  
10 Plant Resistance Research Unit, Box 9555, Mississippi State, MS, 39762, USA

11 <sup>c</sup>National Maize Improvement Center of China, Beijing Key Laboratory of Crop  
12 Genetic Improvement, China Agricultural University, Beijing 100193, China

13

14 <sup>1</sup>These authors contributed equally to this work.

15

16 Corresponding author:

17 Jianbing Yan

18 National Key Laboratory of Crop Genetic Improvement

19 Huazhong Agricultural University, Wuhan 430070, China

20 (ph) +86-27-87280110 (fax) +86-27-87280016

21 Email: [yjianbing@mail.hzau.edu.cn](mailto:yjianbing@mail.hzau.edu.cn)

22

23 Running title: maize complex adaptation

24 Keywords: adaptation, transcriptome regulation, evolutionary genetics, *Zea mays*

25

26

27 **Abstract**

28       The temperate-tropical division of early maize germplasm to different agricultural  
29 environments was arguably the greatest adaptation process associated with the success  
30 and near ubiquitous importance of global maize production. Deciphering this history is  
31 challenging, but new insight has been gained from the genomic, transcriptomic and  
32 phenotypic variation collected from 368 diverse temperate and tropical maize inbred  
33 lines in this study. This is the first attempt to systematically explore the mechanisms of  
34 the adaptation process. Our results indicated that divergence between tropical and  
35 temperate lines seem occur 3,400-6,700 years ago. A number of genomic selection  
36 signals and transcriptomic variants including differentially expressed individual genes  
37 and rewired co-expression networks of genes were identified. These candidate signals  
38 were found to be functionally related to stress response and most were associated with  
39 directionally selected traits, which may have been an advantage under widely varying  
40 environmental conditions faced by maize as it was migrated away from its  
41 domestication center. It's also clear in our study that such stress adaptation could  
42 involve evolution of protein-coding sequences as well as transcriptome-level  
43 regulatory changes. This latter process may be a more flexible and dynamic way for  
44 maize to adapt to environmental changes over this dramatically short evolutionary time  
45 frame.

## 46 **Introduction**

47 Maize (*Zea mays* ssp. *mays*) is essential to the global food supply, with current  
48 total maize grain production higher than any other crop (USDA FAS 2013). Maize is  
49 also used as a model to investigate crop evolution and improvement (Doebley et al.  
50 2006). It is thought to have been domesticated from teosinte (*Zea mays* ssp.  
51 *parviglumis*) about 9,000-10,000 years ago in southwestern Mexico, which is a mid- to  
52 lowland tropical growing environment (Matsuoka et al. 2002; Van Heerwaarden et al.  
53 2011). The remarkable conversion of a Mexican annual grass species into the top food,  
54 feed and industrial crop in the world resulted from the spread of temperate maize over  
55 several thousand years from its tropical geographic origin to the north and east across  
56 North America and to the south across most of Latin America, eventually creating a  
57 maize distribution from ~40°S in Chile to ~45°N in Canada (Matsuoka et al. 2002).  
58 Centuries ago, maize cultivation expanded further to East Asia, Europe, and Africa,  
59 and the temperate-tropical division remains in all crop-growing continents today. When  
60 faced with widely varying temperate conditions in temperature, day length, and disease  
61 susceptibility, maize adapted remarkably well. One major goal of adaptation studies is  
62 to identify specific genomic changes contributing to advantageous phenotypic  
63 performance in varying environmental conditions.

64  
65 In order to identify the genetic factors driving maize evolution, researchers have  
66 explored a number of methods to reveal footprints of selection within the genome  
67 (Chia et al. 2012; Hufford et al. 2012; Jiao et al. 2012). It is intriguing that these  
68 changes occurred within such a short evolutionary time frame. The importance of  
69 transcriptional regulation of rapid phenotypic evolution has been a central tenet of  
70 recent studies (Swanson-Wagner et al. 2012; Carroll 2008; Ecker et al. 2012; Koenig et  
71 al. 2013). Genes with differential expression and altered expression networks could  
72 provide evidence of the contribution of transcriptome regulational changes to the  
73 adaptation process. RNA-seq (Wang et al. 2009) allows cost-effective exploration of  
74 both sequence and transcriptional variation, particularly in large and repetitive  
75 sequence-rich genomes such as maize.

76  
77 Seed development, a critical process to both plant propagation and food supply, is a  
78 time in which DNA methylation and chromatin remodeling, and thus transcriptional  
79 patterns, are reshaped for the new generation (Ahmad et al. 2010; Wollmann et al.  
80 2012; Zanten et al. 2011). Transcriptional variation may thus heavily influence

81 seed-related traits via environmentally-sensitive epigenetic control (Zhang and Ogas  
82 2009), which will be expressed as selectable variation throughout the lifetime of the  
83 plant (Kapazoglou et al. 2013; Casas et al. 2012). Most maize genes are expressed in  
84 seed or embryos, many of which are not expressed again (Cho et al. 2012; Sekhon et al.  
85 2011). Thus, the seed offers the best window into visualizing differences that may  
86 account for adaptation.

87

88 To study the nature of maize adaptation from tropical to temperate growing regions, a  
89 panel of 368 diverse maize inbred lines (Li et al. 2013) (Supplemental Table S1) was  
90 characterized. We combined RNA-seq of seeds (15 days after pollination; Fu et al.  
91 2013) with data from the MaizeSNP50 BeadChip, resulting in over one million  
92 high-quality SNPs and expression data from 28,769 genes, analyzed together with 662  
93 phenotypic traits. These included morphological, agronomic, physiological and  
94 metabolic traits, many of which are also known to be important in stress adaptation  
95 (Bohnert and Sheveleva 1998; Bhargava and Sawant 2013). This study is the first  
96 systematic exploration of the mechanisms of the maize adaptation process with the  
97 goal of answering several specific questions: What phenotypic changes in temperate  
98 lines convey an advantage in novel environments? Which genomic regions were  
99 selected during the adaptation process? What phenotypes do these regions likely affect?  
100 To what extent do regulatory changes contribute to evolution? What beneficial value  
101 do they provide in the relatively short evolutionary time frame suggested in this study?  
102 Although only one organ (the seed) was sequenced, such knowledge will position us  
103 with general understanding of the maize adaptation process, and provide resources for  
104 developing breeding strategies to help corn producers cope with an increasingly erratic  
105 climate.

106

## 107 **Results**

### 108 **Population level differences between temperate and tropical lines**

109 The population-scaled recombination rates ( $\rho$ ) in temperate and tropical lines were  
110 1.078/kb and 2.644/kb, respectively. This is a reflection of different rates of LD decay,  
111 which was much faster in the tropical lines at the whole genome level (Supplemental  
112 Fig. S1). Recombination rate differences in temperate vs. tropical lines was smaller  
113 than the decrease in  $\rho$  seen in a previous study by Hufford et al. (2012) in landraces  
114 compared to teosinte (59% vs. 75%). A cross population composite likelihood approach  
115 (Chen et al. 2010) (XP-CLR) was used to identify extreme allele frequency

116 differentiation over linked regions when comparing temperate to tropical  
117 subpopulations. We identified 701 regions containing 1660 selected genes at the  
118 highest 10% of XP-CLR values (Fig. 1, Supplemental Table S2,3), ranging in size from  
119 10kb to 2,320kb, with an average of 150.9kb; this is shorter than the 322kb average  
120 region associated with domestication (Hufford et al. 2012). The combined length of  
121 selected regions was 105.7Mb, covering 5.2% of the genome. The selection coefficient  
122 in the adaptation process was 0.090, which is higher than domestication (0.015) and  
123 improvement (0.003) (Hufford et al. 2012), indicating a stronger selection pressure  
124 during the adaptation process. However, the coefficient and size of the genomic region  
125 associated with selection may not be directly comparable with adaptation, since most  
126 polymorphisms in the current study are based on expressed genes, compared to random  
127 sequence polymorphisms measured by Hufford et al. (2012)

128

129 Nucleotide diversity ( $\pi$ ) in the selected features identified by XP-CLR in temperate vs.  
130 tropical lines was 8.22E-04 and 8.42E-04, respectively, indicating a reduction of 2.4%  
131 in temperate lines. This decrease is less than the reduction of nucleotide diversity in  
132 selected features identified during domestication (17%) by Hufford *et al.* (2012).  $F_{st}$  of  
133 selected features was 0.027, compared to 0.11 between teosinte and landraces, possibly  
134 due to the shorter time for adaptation from tropical to temperate than for domestication.  
135 However, this result is similar to 0.02 reported between landraces and improved lines  
136 (Hufford et al. 2012).

137

138 The divergence time between temperate and tropical subpopulations is of interest and  
139 can be associated with the development of agriculture and the spread of human  
140 civilization in the Americas; however, archeological information on this topic is  
141 incomplete and occasionally contradictory (Piperno and Pearsall 1998; Staller and  
142 Thompson 2002; Blake et al. 2006; Grobman et al. 2012). We proposed three models  
143 (detailed in the methods section, Fig. 2A-C) to estimate the time of divergence,  
144 resulting in the estimation of 3,400-6,700 years BP. This time frame is supported by  
145 recent archeological evidence (Haas et al. 2013) and implies that after domestication,  
146 maize cultivation rapidly expanded to temperate America (Fig. 2D). The molecular  
147 evidence thus suggests that improvement and adaptation here may not have been  
148 sequential and discrete processes, but overlapped in maize. Although gene flow  
149 between maize and its wild relatives has been shown to be of adaptive importance for  
150 maize evolution (Van Heerwaarden et al. 2011; Hufford et al. 2013), and has been

151 measured in tropical maize (Warburton et al. 2011), it has been difficult to measure the  
152 rate or effect of gene flow in temperate lines following divergence; thus, we do not  
153 factor it into our analysis.

154

### 155 **Genome-wide selection analysis and functional correspondence**

156 The 701 selected regions were compared to 466 and 573 regions identified in  
157 domestication and improvement previously, respectively (Hufford et al. 2012;  
158 Supplemental Fig. S2). Seven regions were identified in all three processes, and may  
159 play a similar role in domestication and post-domestication, contributing to the unique  
160 phenotypes of temperate maize. Most adaptation regions did not overlap with  
161 domestication and improvement at all, indicating different genomic factors  
162 contributing to the phenotype changes during adaptation.

163

164 Gene Ontology (GO) annotation of the top 571 candidate genes (see Materials and  
165 Methods) within the 701 selected regions reflected genes responding to stress,  
166 development, and metabolic processes (Supplemental Table S4). *MFT* (Mother of FT  
167 and TFL1, GRMZM2G059358), was identified as a strong candidate gene in  
168 adaptation (Fig. 1). It encodes a maize MFT-like protein, which is involved in seed  
169 dormancy and germination, a complex adaptation process modulated through a  
170 negative feedback loop via ABA (Xi et al. 2010). *MFT* is also known to be involved in  
171 control of shoot meristem growth and flowering time (Yoo et al. 2004). Flowering time  
172 changes is critical that allow maize to adapt to different environmental conditions such  
173 as photoperiod and temperature. Another gene, GRMZM2G360455, an important locus  
174 affecting the photoperiod response based on the maize nested association mapping  
175 (NAM) population analysis (Buckler et al. 2009), and also containing the  
176 “CO/CO-Like/TOC1 conserved site” (CCT), which is always contributed in circadian  
177 clock and flowering time (Robson et al. 2001; Griffiths et al. 2003; Cockram et al.  
178 2012), was selected during maize adaptation (Fig. 3A). Metabolic processes  
179 influencing nutritionally important traits such as starch content and oil concentration  
180 could likely be targets of selection not only during domestication and improvement but  
181 also adaptation, as different soil and climate conditions will influence developmental  
182 stage of germinating maize. Some genes associated with nutritional traits were selected  
183 during the adaptation process in our study (Fig. 1), such as *su2* (GRMZM2G348551),  
184 *zpu1* (pullulanase-type starch debranching enzyme1, GRMZM2G158043), and *sdp1*  
185 (GRMZM2G087612); these have also been identified as selection targets during

186 domestication and improvement (Zhang et al. 2004; Beatty et al. 1999; Eastmond  
187 2006).  
188  
189 Selected metabolic pathways responding to a changing environment are also involved  
190 in the adaptation process. Glutathione plays an important role in cellular processes  
191 under biotic stress (Dubreuil-Maurizi and Poinssot 2012) and is one such example.  
192 Accordingly, *gst35* (Glutathione S-transferase 35, GRMZM2G161891), *gst41*  
193 (Glutathione S-transferase 41, GRMZM2G097989) and *gsh1*  
194 (gamma-glutamylcysteine synthetase1, GRMZM2G111579), which influence  
195 glutathione metabolism, were all within our selected regions (Fig. 1). Traits related to  
196 plant architecture and vegetative growth were also selected during adaptation, and their  
197 corresponding genes were found in our top XP-CLR hits, including *rs2* (rough sheath2,  
198 GRMZM2G403620), essential for normal leaf morphology (Phelps-Durr et al. 2005);  
199 *bk2* (brittle stalk2, GRMZM2G109326) affecting mechanical strength of maize by  
200 altering the composition and structure of secondary cell wall tissues (Ching et al. 2006),  
201 and *apt1* (aberrant pollen transmission1, GRMZM2G448687), affecting the elongation  
202 of root cortex cells and pollen tubes during temperature stress (Xu and Dooner 2006)  
203 (Fig. 1, Supplemental Table S3).

204

#### 205 **Phenomic changes affecting adaptation and validation of selected regions.**

206 Adaptation involves selection of different ecotypes suited to different environments,  
207 leading to measurable phenotypic differences between environments. To test this  
208 assumption, we collected 662 phenotypic data points including agronomic, yield, seed  
209 quality, and seed metabolic traits (Supplemental Tables S5, 6, 7; Wen et al. 2014). The  
210  $Q_{ST} - F_{ST}$  method (Leinonen et al. 2013), by comparing complex partitioning of  
211 variation of quantitative traits and neutral molecular markers (see methods for details),  
212 allowed us to distinguish whether the divergent traits are caused by directional  
213 selection ( $Q_{ST} > F_{ST}$ ), genetic drift ( $Q_{ST} \approx F_{ST}$ ), or stabilizing selection ( $Q_{ST} < F_{ST}$ )  
214 (Leinonen et al. 2013). One hundred and thirty traits displayed both divergent patterns  
215 suggestive of directional selection across the populations and significant ( $p \leq 5.1E-05$ )  
216 differences between the tropical and temperate subgroups (Supplemental Table S8),  
217 which were likely to contribute to improved phenotypic performance in temperate  
218 conditions.

219

220 To test if selected regions contributed to these phenotypic changes, a genome wide

221 association study (GWAS) was performed on the 130 divergent traits with 24,595  
222 SNPs from the selected regions. In total, 345 regions (49.22% of the total) were  
223 associated with 100 of the 130 traits ( $P < 4.06E-05$ ), including three agronomic (days  
224 to silking, cob color and kernel color), one amino acid (Ala), and 96 metabolic traits  
225 (Supplemental Table S9). The genes identified here undoubtedly represent only a  
226 fraction of the total genes selected during adaptation, since many target traits were not  
227 measured in this study.

228

229 Resistance to new biotic stresses was essential to the adaptation process. Gene  
230 GRMZM2G095043 falls within a selected genomic region, and likely contributes to  
231 resistance to new pathogens faced by migrating maize. This gene contains a  
232 WD40-repeat domain potentially involved in the regulation of the flavonoid pathway  
233 (Koes et al. 2005), and showed a strong association with both cob color and Tricin  
234 O-pentosyl-O-hexoside (n1570) in temperate lines in this study (Fig. 3D, E, F;  
235 Supplemental Table S9). Tricin O-pentosyl-O-hexoside is a flavonoid, and flavonoids  
236 are colored compounds that increase insect resistance (McMullen et al. 2009; Falcone  
237 et al. 2012).

238

239 Quantitative trait locus (QTL) mapping was used to confirm the phenotypic effect of  
240 the selected regions. As flowering time changes is representative that allow maize to  
241 adapt to temperate environmental conditions such as photoperiod and temperature.  
242 Three RIL populations generated by crossing temperate lines with tropical/subtropical  
243 lines were used to map flowering time (Supplemental Table S10). The identified QTL  
244 were reported in Supplemental Table 7, and many (113, or 62%) overlapped  
245 significantly ( $P < 2.2E-16$ ) with the identified selected regions (Fig. 1). For example,  
246 gene GRMZM2G360455, encoding a CCT domain-containing protein was located in  
247 the QTL interval for days to silking under short day (tropical) but not under long day  
248 (temperate) conditions, and also a candidate response to flowering time of the maize  
249 NAM population (Buckler et al. 2009), was identified within a selected region (Fig. 3A,  
250 B, C). Further study of this gene may provide a better understanding of maize  
251 flowering time and adaptation.

252

### 253 **Significance of transcriptional regulation to adaptation**

#### 254 *Differential expression*

255 Changes in gene regulation, impacting gene expression level but not gene structure, are



256 fundamental to the evolution of morphological and developmental diversity  
257 (Swanson-Wagner et al. 2012; Carroll 2008). The present datasets provide an excellent  
258 resource for investigating the contribution of transcriptome regulation to the adaptation  
259 process. The coefficient of variation (COV) was similar between tropical and  
260 temperate germplasm when considering gene expression of all genes (Fig. 4A),  
261 suggesting that most inbreds were probably at the same developmental stage and that  
262 no transcriptome-wide changes occurred between tropical and temperate lines. This  
263 agrees with a previous study (Swanson-Wagner et al. 2012), indicating that overall  
264 changes in expression did not happen during domestication and post-domestication. To  
265 study specific transcriptome signal response of individual genes or groups of genes  
266 contributing to the adaptation process,  $Q_{ST}$ - $F_{ST}$  of differentially expressed genes were  
267 compared, including single genes differentially expressed under different conditions or  
268 in different samples (DE), and genes with altered expression conservation (AEC)  
269 (Swanson-Wagner et al. 2012), representing the rewired co-expression of a gene  
270 network.

271

272 Among 28,769 expressed genes, 2,700 (9.4% of the total) showed significant  
273 differential expression (posterior prob. > 0.9999); all exceeded neutral expectation  
274 (Supplemental Table S11). Comparing between temperate and tropical lines in the  
275 public available database with the same quantitative measurement and DE analysis  
276 process, we found a major part of these DE genes were also expressed differently in  
277 other tissues, including the shoot apex (Li et al. 2012), ( $P = 1.88E-38$ ) and seeding L3  
278 leaf (Eichten et al. 2013), ( $P = 1.44E-15$ ; Supplemental Fig. S3). This is highly  
279 suggestive that most differentially expressed genes identified here were not caused by  
280 random environmental and developmental variation and that many of the candidate DE  
281 genes continued to be important to adaptive differences later in the development of the  
282 mature plant. With more relaxed posterior probability (> 0.999), 14.4% of the total  
283 genes showed expression differences, and most were still likely to have been caused by  
284 directional selection (Supplemental Fig. S4).

285

286 There were 871 up- and 1,829 down-regulated genes in temperate vs. tropical lines  
287 (Fig. 4B, Supplemental Table S11). These DE candidates tend to be regulated by  
288 distant eQTLs ( $P = 1.74E-4$ , eQTL data from Fu et al. 2013), and especially for  
289 up-regulated ( $P = 9.67E-12$ ) but not for down-regulated ( $P = 0.83$ ) genes in temperate  
290 maize. With local (cis-) regulation, expression differences are caused by one regulatory

291 region near each expressed gene, while more distant (trans-) regulation often sees the  
292 expression of whole groups of genes regulated by a single genetic factor, causing  
293 potential widespread pleiotropic effects. Thus, trans-regulatory mutations seem to be  
294 better suited to the changes of complex phenotypes which are governed by the  
295 coordinated expression patterns of multiple genes and a single regulator. While some  
296 previous studies have emphasized the key role for cis-regulatory evolution (Wray et al.  
297 2007; Stern et al. 2009), our results suggest that trans-regulatory variation could  
298 contribute more commonly to adaptive phenotypic divergence.

299

300 Gene Ontology (GO) analysis (Fig. 4C, D) of DE genes showed an enrichment of  
301 up-regulated genes involving molecular function, especially in catalytic activity,  
302 oxidoreductase activity, endopeptidase inhibitor activity and transferase activity  
303 (Supplemental Fig. S5). Endopeptidase levels are influenced by stress in plants (Antão  
304 and Malcata 2005; Richen et al. 2003) and animals (Karlsson et al. 2006), but clear  
305 mechanisms are still unknown. The GO analyses of down-regulated genes in temperate  
306 lines revealed enrichment of genes involved in processes such as response to stimuli,  
307 metabolism, and regulation (Supplemental Fig. S5). The same GO analyses also  
308 uncovered genes involved in cellular components and molecular functions; one  
309 down-regulated protein serine/threonine phosphatase involved in both aspects was  
310 particularly significant and is associated with biotic and abiotic stress (Antão and  
311 Malcata 2005) (Supplemental Fig. S5).

312

313 The MADS-box family of transcription factors is important in the evolution of plant  
314 architecture and angiosperm inflorescence development, and is frequently identified as  
315 targeted regions of selection during the domestication of maize (Zhao et al. 2011).  
316 Three MADS-box genes [*zmm5* (GRMZM2G148693), *zmm29* (GRMZM2G152862)  
317 and *zap1* (GRMZM2G171365)] were all down-regulated in temperate lines  
318 (Supplemental Fig. S6). These genes belong to the MICK<sup>c</sup> class of the MADS-box gene  
319 family and the TM3, GLO and SQUA subfamilies, respectively, and are involved in  
320 growth and flower homeotic function (Münster et al. 2002). The circadian clock is vital  
321 in flowering time networks which consist of three negative feedback loops. Gene  
322 *TOC1b* (GRMZM2G148453) is located in the central loop (Kolmos et al. 2008), and  
323 showed down-regulation in temperate lines in the current study (Supplemental Fig. S6).  
324 Some domestication and improvement genes (James et al. 1995; Jackson and Hake  
325 1999; Gross and Olsen, 2010) were also identified in the DE analysis, such as *tb1*

326 (teosinte branched 1, AC233950.1\_FG002), *su1* (sugary 1, GRMZM2G138060), and  
327 *abph1* (aberrant phyllotaxy1, GRMZM2G035688) (Supplemental Fig. S6). The  
328 presence of domestication or improvement genes in the adaptation process implies  
329 sustaining natural and artificial selection throughout the entire process of maize  
330 evolution.

331

332 Only 129 genes were identified both in DE and genome selection analysis. Gene  
333 Ontology analysis of these genes further indicates a diverse range of biological  
334 functions, from response to stimulus to biological regulation and metabolic processes  
335 (Supplemental Fig. S7). Since the two data sets have few genes in common, no specific  
336 pathways were highlighted in the simultaneous analysis of the two data sets. Additional  
337 genes could be found in transcriptome analysis of RNA collected from other tissues  
338 and organs, and a more complete annotation of maize genes would increase the number  
339 of genes in known pathways, which are currently incomplete.

340

341 To seek association between DE genes and the divergent traits, transformed expression  
342 values of DE genes were analyzed via DE-GWAS (see Materials and Methods) with  
343 the 130 traits that had been found to be significantly different between tropical and  
344 temperate lines. Two hundred and forty five DE genes (9.07% of the total) were  
345 associated ( $P < 1E-3$ ) with 101 traits, including 75 traits overlapping with those detected  
346 by trait-SNP GWAS (Table 1). The 101 DE associated traits included 6 agronomic (cob  
347 color, days to silking, days to tasseling, days to pollen shedding, leaf number and  
348 kernel color), 5 amino acid (Ala, Arg, Asp, Lys, Gly) and 90 metabolic traits  
349 (Supplemental Table S12). Seven of the genes identified as associated in the genomic  
350 sequence analysis overlapped with genes identified in the DE-GWAS analysis.

351

352 A series of DE genes (*c2*, *pr1*, *a1*, *bz1*, *whp1*) were detected that influence cob color  
353 via the flavonoid biosynthetic pathway (Sharma et al. 2012) (Fig. 5). Cob color  
354 segregated only in the temperate group and is known to be affected by chalcone  
355 synthase (CHS) and maysin synthesis, which are thought to be major contributors to  
356 corn worm resistance (McMullen et al. 2009; Sharma et al. 2012). As can be seen in  
357 Fig. 5, *c2* (colorless2, GRMZM2G422750) is one of the main genes of the CHS  
358 pathway and is located upstream of maysin synthesis (Sharma et al. 2012). *pr1* (purple  
359 aleurone1 or red aleurone1, GRMZM2G025832) is located downstream of *c2*, encodes  
360 a CYP450-dependent flavonoid 3'-hydroxylase required for synthesis anthocyanin, and

361 is involved in naringenin chalcone catabolism (Sharma et al. 2012). *al*  
362 (*anthocyaninless1*, GRMZM2G026930), located downstream of *c2* and *pr1*, is  
363 involved in the production of anthocyanins (Sharma et al. 2012). *c2* and *al* were  
364 significantly associated with flavonoid catabolism (Supplemental Table S12). Kernel  
365 color ranked from light to dark (Supplemental Fig. S8A) displayed different  
366 distributions between tropical and temperate subgroups (Supplemental Fig. S8B), and  
367 was slightly negatively correlated with cob color (Supplemental Fig. S8C,  $P =$   
368  $1.31E-05$ ). Kernel color was also affected by DE genes within the CHS pathway and  
369 different association patterns were observed between tropical and temperate lines by  
370 DE-GWAS analysis (Supplemental Fig. S8D).

371

### 372 ***Altered expression conservation***

373 While DE can identify individual differentially expressed genes, altered expression  
374 conservation (Swanson-Wagner et al. 2012) (AEC) reflects the relationship of genes  
375 with their co-expressed group. In total, 389 genes showed the strongest AEC patterns  
376 (expression conservation score  $>2.5SD$ ; Supplemental Table S13). Further analysis  
377 indicated that the average number of genes significantly co-expressed with AEC  
378 candidates (as measured by an absolute Pearson correlation coefficient  $\geq 0.3$ ) in  
379 temperate lines was higher (259 genes) than in tropical lines (147 genes; Supplemental  
380 Fig. S9). This indicates that the changes faced in temperate environments may have  
381 enhanced interactions between genes in certain pathways. Among the stronger  
382 relationships, the number of genes with negative correlations (Pearson correlations  
383 coefficient  $\leq 0$ ) was higher in temperate germplasm as well (24.4% in temperate lines  
384 vs. 3.2% in tropical lines). Few genes were co-expressed with the same candidate AEC  
385 gene in both temperate and tropical lines (Supplemental Fig. S9), which suggests a  
386 rewiring of the regulation networks in the temperate subgroup during adaptation.  
387 However, the rewiring appears to have been less dramatic during adaptation since  
388 fewer AEC genes were identified for adaptation than for domestication  
389 (Swanson-Wagner et al. 2012). In contrast, the number of differentially expressed  
390 individual genes found in the adaptation analysis was higher than for domestication  
391 (Swanson-Wagner et al. 2012).

392

393 As sessile organisms, plants have evolved to integrate endogenous and external  
394 information and employ signal transduction processes to allow growth plasticity and  
395 survive and thrive in their environments. Essential to this plant-environment interaction

396 are plant hormones, including auxins, ethylene, abscisic acid, and brassinosteroids,  
397 which play a key role in plant growth, development, defenses and stress tolerance  
398 (Wolters and Jürgens 2009). Plant hormones modulate gene expression by controlling  
399 either the abundance of transcriptional factors or repressors, or their activities through  
400 post-translational modifications (Dharmasiri et al. 2013). Hormonal cross-talk and  
401 interaction with other plant compounds and environmental factors rely on complicated  
402 signaling networks. These networks generally intersect in central nodes. Six candidate  
403 genes related to plant hormones were observed in our AEC analysis and may act as  
404 central nodes in plant hormonal production. Three (GRMZM2G078480,  
405 GRMZM5G860241 and GRMZM2G086773) belong to brassinosteroid biosynthesis  
406 pathway, one (GRMZM5G864847) was an auxin-responsive Aux/IAA family member,  
407 and two (GRMZM2G026131, GRMZM2G390385) were in the pathway producing  
408 ethylene biosynthesis from methionine (Supplemental Fig. S10). These candidates,  
409 along with their co-expressed genes, showed very different networks in temperate vs.  
410 tropical germplasm (Supplemental Fig. S10). This could provide helpful clues to a  
411 deeper understanding of the complex relationship between hormones and their  
412 contributions to maize adaptation.

413

414 Many studies have identified the function of F box receptors in hormone controlling  
415 and signaling (Dharmasiri et al. 2005; Kepinski and Leyser 2005; Koops et al. 2011;  
416 Shen et al. 2012). AEC analysis also identified an F-box protein (GRMZM2G031958;  
417 Jia et al. 2013) displaying different regulation patterns, with a series of 462 and 85  
418 highly co-expressed genes observed in temperate and tropical lines, respectively.  
419 Beyond the remarkable difference in network size, several co-expressed enzymes,  
420 including cytochrome-c reductases, NADH-ubiquinone oxidoreductases, peroxidases  
421 and amidase, and some genes functioned in abscisic acid and IAA biosynthesis and  
422 gluconeogenesis were only exists within temperate lines. These results are consistent  
423 with the earlier studies that F-box proteins could play a regulatory role in  
424 glucose-induced seed germination by targeting ABA synthesis (Song et al. 2012).  
425 F-box proteins also play critical roles in seed development, grain filling and response  
426 to abiotic stress(Jain et al. 2007) in crop plants, and co-expressed (with our F-box  
427 candidate) genes involved in cytokinins degradation, cellulose biosynthesis, and  
428 flavonoid and flavonol biosynthesis pathways were observed in the temperate  
429 subgroup but not in the tropical. This F-box gene was also highly co-expressed with an  
430 ethylene-responsive factor-like protein (GRMZM2G169382), an abscisic stress protein

431 homolog (GRMZM2G044132), a SAUR37-auxin-responsive family member  
432 (GRMZM2G045243), another two F-box domain-containing proteins  
433 (GRMZM2G116603 and GRMZM2G071705) and several transcriptional factors  
434 (zmm29, GRMZM2G152862; ethylene-responsive transcription factors,  
435 GRMZM2G474326 and GRMZM2G169382; WRKY1, GRMZM2G018487;  
436 WRKY25, GRMZM2G148561; WOX2B, GRMZM2G339751; and more with putative  
437 regulation of transcription functions). In addition, the teosinte glume architecture 1  
438 (tga1) protein and an Early Flowering 4 (EF4)-like protein simultaneously showed  
439 strong relationships with the target F-box gene. These two proteins have been  
440 hypothesized to contribute to maize adaptation to temperate climates in past studies  
441 (Khanna et al. 2003; Ducrocq et al. 2008). The identification of the genes encoding  
442 these proteins made the network more complex, and further studies are needed. Gene  
443 Ontology analysis of all the co-expressed genes in temperate lines revealed an  
444 abundance of genes that respond to temperature stimulus and abiotic and other stress  
445 (Supplemental Table S14), which were undoubtedly required during maize adaptation  
446 to temperate environments.

447

## 448 **Discussion**

449 The process of adaptation was as important a driving factor as domestication in the  
450 creation of a geographically diverse crop, allowing maize to spread into a wide range  
451 of environments around the world. The impacts of domestication and improvement on  
452 the genome and transcriptome have started to be studied (Hufford et al. 2012;  
453 Swanson-Wagner et al. 2012), but adaptation has not been as systematically analyzed.  
454 In this study, large sets of genomic, transcriptomic and phenomic data were used to  
455 analyze the mechanisms of morphological evolution leading to adaptation. Plant  
456 response to the environmental change especially stress may have been the key initial  
457 step towards adaptation to more extreme latitudes (Fig. 2D). A variety of mechanisms  
458 could have contributed to stress response during the maize life cycle, including  
459 changes in seed dormancy, germination, plant architecture, flowering time, and optimal  
460 utilization of resources (nitrogen, water, etc). In the face of new biotic stresses, a series  
461 of resistance mechanisms can also evolve at both the genomic and transcriptomic  
462 levels. Traits allowing the plant to successfully respond to stress are precisely those of  
463 interest to farmers and plant breeders who have achieved improvement of temperate  
464 lines by the selection of such stress tolerance (Tollenaar and Wu 1999).

465



466 It has been suggested that studies scanning for positive selection may incur high  
467 false-positive rates and can be misleading (Pavlidis et al. 2012). In this study, we use  
468 two additional and reliable methods, GWAS and QTL mapping, to provide stronger  
469 evidence for the selected regions and a link to the contributory traits. We also identified  
470 transcriptomic variants contributing to the adaptation process, including differentially  
471 expressed individual genes and evidence for rewiring of co-expression networks. These  
472 candidate genes and regions were found to be functionally related to stress response  
473 and most were associated with the directionally selected traits. While this study  
474 focused on seed transcriptome, the seed-expressed genes and phenotypes provide the  
475 first steps towards a systematic study of the adaptation process and inform our  
476 understanding of the extent to which transcriptome variation influences the  
477 environmental adaptation process.

478

479 It has been recently reported that human adaptation is driven primarily by gene  
480 expression changes (Fraser 2013). The present study reveals that transcriptome  
481 regulation was also prevalent in maize adaptation. Plants live in a dynamic  
482 environment, but selection on genomic variation may be too slow to cause the changes  
483 that allow the plant to adapt to a rapidly changing environment (Chen 2007). Selection  
484 on protein coding sequence variation is risky, as most mutations are harmful or lethal  
485 to the organism, and even changes which are beneficial to some of cells or under some  
486 conditions may be harmful to other tissues or under other conditions (Ecker et al. 2012).  
487 Sufficient protein-coding sequence changes at the genomic level would be unlikely to  
488 respond to environmental changes experienced in one or a few generations; however,  
489 rapid changes in transcriptome regulation can occur quickly and lead to a rapid  
490 phenotypic differentiation (Chen 2007). Transcriptome changes are  
491 resource-economical and are frequently associated with temporally and spatially  
492 related gene-expression patterns, the effects of which can be limited to specific cells  
493 (Carroll 2008; Ecker et al. 2012). Our models, indicating a separation time between  
494 temperate and tropical maize of 3,400-6,700 years BP, suggest that a great number of  
495 changes took place during a few thousand years. The differences in transcription of  
496 individual genes and correlated suites of genes between temperate and tropical maize  
497 can be explained by this hypothesis. Some studies (Cortessis et al. 2012; Ptashne 2007)  
498 have suggested that epigenetic regulation was the main genetic driver causing  
499 regulatory evolution, and that epigenetic modification could also lead to increased  
500 mutation rate (Rideout et al. 1990; Schuster-Böckler et al. 2012). Further study and

501 more direct evidence will be needed to better understand the interplay between  
502 epigenetic and genetic processes under selection and provide new insights, and  
503 possibly new mechanisms, for practical plant improvement.

504

505 Although our comprehensive study of genomic, transcriptomic and phenomic variation  
506 sheds new light on the process of adaptation in modern maize, much is left to be  
507 uncovered. In particular, changes due to adaptation of temperate maize are inferred in  
508 the current study by comparing temperate maize with tropical maize grown in northern  
509 temperate growing areas. Although similar divergence and changes may have  
510 happened as maize migrated to far southern temperate regions, no South American  
511 maize was studied here and thus this conclusion remains to be confirmed. In future  
512 studies, expression data from more tissues and genotypes need be included and studied  
513 under more environmental conditions to allow a finer dissection of genes and  
514 mechanisms involved in adaptation. It also should be kept in mind that all the  
515 genotypic variation was identified by comparison to the temperate maize reference  
516 genome (B73). If a bias was introduced by this method of polymorphism identification,  
517 it was not considered in this study. Novel assembly strategies taking into account the  
518 variation from more lines could reduce this bias (if present), and exploration of more  
519 variant types, such as presence/absence variation (PAV), should also be considered in  
520 future studies of the adaptation process. Detailed studies on changes in the  
521 transcriptome and in particular, the role of epigenetics, could lead to a clearer  
522 understanding of adaptation, possibly leading in turn to more innovative techniques to  
523 allow plant breeders to apply native trait variation to maize improvement.



524 **Methods**

525 **Maize inbred lines and collection of genotypic, phenotypic and gene expression**  
526 **data.**

527 The 368 maize inbred lines included in this study form a global collection including  
528 representative temperate and tropical/subtropical inbred lines listed in Supplemental  
529 Table S1, and additional information about the lines can be found in previous study  
530 (Yang et al. 2011).

531

532 The poly(A) transcriptome collected from kernels at 15 days after pollination from all  
533 368 lines was sequenced using 90-bp paired-end Illumina sequencing with libraries of  
534 200-bp insert sizes, and 25.8 billion high-quality reads were obtained after filtering out  
535 reads with low sequencing quality. A total of 1.03 million high-quality single  
536 nucleotide polymorphisms (SNPs) with a missing data rate less than 60% were used for  
537 imputation of missing genotypes. Three pairs of biological replicates (SK, Han21, and  
538 Ye478) were used to evaluate the reproducibility of genotyping by RNA-seq. The  
539 concordance rates were greater than 99% between each pair of replicates (Fu et al.  
540 2013), indicating that the sequencing and SNP calling procedures were reproducible. In  
541 addition, all lines were genotyped via the Illumina MaizeSNP50 array. SNPs generated  
542 by RNA-seq also met high concordance rates with the genotypes determined by the  
543 MaizeSNP50 BeadChip (Fu et al. 2013). Both RNA-seq and MaizeSNP50 data sets  
544 were merged to obtain a total of more than 1.06 million SNPs; a final data set of 0.56  
545 million SNPs with a MAF of greater than 5% was produced and more detailed  
546 information can be found in a previous study (Fu et al. 2013).

547

548 To quantify the expression of known genes with annotation in the B73 reference  
549 genome (filtered-gene set, version 2, release 5b), a total of 28,769 genes corresponding  
550 to mapped sequence reads in more than 50% of the inbred lines were compiled, and  
551 each gene averaged more than 1.5K reads. Read counts for each gene were calculated  
552 and scaled according to RPKM (reads per kilo base of exon model per million mapped  
553 reads). After RPKM normalization, all genes with a median expression level greater  
554 than zero for each sample were included, and the overall distribution of expression  
555 levels for each gene was normalized using a normal quantile transformation (Fu et al.

556 2013). The same three pairs of biological replicates were shown to share most  
557 compiled genes (average 95.71%) with high concordance (average person's  $r=0.87$ ,  
558 (Supplemental Fig. S12) in expression quantification between each pair of replicates.  
559 More details on library construction, sequencing, SNP detection, genotype imputation,  
560 positive control of SNP accuracy and quantile normalization of expression is described  
561 in Fu et al. (2013).

562

563 To obtain agronomic traits (reported in Supplemental Table S5), all inbred lines were  
564 planted with randomized complete experimental design by single replication in 2010 in  
565 four locations (Honghe autonomous prefecture, Yunan province; Sanya, Hainan  
566 province; Wuhan, Hubei province; Ya'an, Sichuan province) and 2011 in three  
567 locations (Chongqing; Hebi, Henan province; Nanning, Guangxi province). The seven  
568 different locations ranged from 18 to 35 degrees north in latitude and from 102 to 114  
569 degrees east in longitude. Kernel color was measured in five additional trials over two  
570 years (Sanya, Hainan province in 2011; Honghe autonomous prefecture, Yunan  
571 province in 2012; Chongqing in 2012; Wuhan, Hubei province in 2012; Hebi, Henan  
572 province in 2012). All agronomic traits were measured and the Best Linear Unbiased  
573 Predictor (BLUP) values from different environments and years were used for final  
574 analysis (Supplemental Table 2). Maize kernels from each entry in the panel planted in  
575 Chongqing in 2011 were collected to quantify amino acid content (Supplemental Table  
576 S6), and samples from the panel planted in Yunnan (2011) and Hainan (2010) were  
577 harvested to measure metabolic traits. Only the metabolites measured in at least two of  
578 the three experiments and showing high correlation ( $P$  value $<0.05$ ) in the two  
579 experiments were retained to calculate BLUP values for the next analysis  
580 (Supplemental Table S7).

581

## 582 **Population structure of 368 inbred lines**

583 The STRUCTURE software package (Pritchard et al. 2000) was used to analyze the  
584 population structure and the EIGENSOFT analysis package (Patterson et al. 2006;  
585 Price et al. 2006) was used to run a Principal Component Analysis (PCA) of the panel  
586 used in the present study (Supplemental Fig. S13). Considering the computation time, a  
587 SNP marker subset was used for inferring population structure; the subset of 14,685  
588 SNPs was created by removing adjacent SNPs within 50Kbp intervals. All lines were

589 divided into three subpopulations corresponding to stiff stalk (SS), non-stiff stalk (NSS)  
590 and tropical and sub-tropical (TST) clusters by STRUCTURE, using a probability of  
591 inclusion into each cluster of greater than 0.65 (Yan et al. 2009). In the final analysis,  
592 there were 133 temperate (103 NSS + 30 SS) lines, 149 tropical (TST) lines, and 86  
593 mixed lines (Supplemental Table S1, Supplemental Fig. S13). The mixed were  
594 excluded from further analyses to allow a clearer comparison between tropical and  
595 temperate features. The population structure was similar to the analysis of the same  
596 lines reported previously using 1536 SNPs (Yang et al. 2011).

597

### 598 **Measuring the genomic changes occurring during the maize adaptation process**

599 To evaluate changes in the maize genome due to adaption, population genetics  
600 statistics including  $\pi$  (Tajima 1983) and  $F_{st}$  (Nei 1977) were calculated within the  
601 differently adapted maize groups.  $F_{st}$  was estimated as follows:

$$F_{st} = (H_T - H_S) / H_T$$

$$H_S = 1 - \omega_{tem} \times (freqA_{tem}^2 + freqB_{tem}^2) - \omega_{tst} \times (freqA_{tst}^2 + freqB_{tst}^2)$$

$$H_T = 1 - (\omega_{tem} \times freqA_{tem} + \omega_{tst} \times freqA_{tst})^2 \\ - (\omega_{tem} \times freqB_{tem} + \omega_{tst} \times freqB_{tst})^2$$

602 Where  $H_S$  refers to heterozygosity within subpopulations, and  $H_T$  refers  
603 heterozygosity in the overall population. The variable  $\omega$  refers to proportion of  
604 subpopulation based on size, and  $freqA/freqB$  is the frequency of allele A or allele  
605 B in each subpopulation. The Synbreed package (Wimmer et al. 2012) of the R-project  
606 statistical package (<http://www.R-project.org>) was used to compute the linkage  
607 disequilibrium (LD) coefficient,  $r^2$ . The ggplot2 package of R (Wickham 2009) was  
608 used to plot LD decay, as well as all visualization in this study (except as noted,  
609 below).

610

611 To identify regions of the maize genome that have undergone selection during the  
612 process of adaption from tropical to temperate climates, a cross-population composite  
613 likelihood approach (Chen et al. 2010) (XP-CLR) was used. The following parameters  
614 were applied to implement the XP-CLR test: the size of the window was 0.005 Morgan;  
615 the maximum number of controlled SNPs within a window was 100; the spacing  
616 between two grid points was 1000 bp; and a corrLevel value of 0.7 was used as a

617 down-weighted criterion in the weighted composite likelihood ratio test. Adjacent  
618 10kb-windows from the top 20% of the XP-CLR results were merged into larger  
619 regions, according to Hufford et al. (2012), and only one window lower than 20% was  
620 retained for each region. Regions in the highest 10% of the mean region-wise XP-CLR  
621 values were regarded as having undergone selection. Gene sequences closest to the  
622 maximum XP-CLR value were designated as the most likely candidate genes for  
623 selection, while others within each selected region were considered as possible selected  
624 genes. The linkage map used in the XP-CLR analysis was constructed using an RIL  
625 population generated from the cross of B73×BY804 with 197 individuals described  
626 previously (Chander et al. 2008) and the maize SNP50 chip (Ganal et al. 2011) was  
627 used to re-genotype the RIL population with 15,285 polymorphic SNPs. The distance  
628 between unmapped SNPs was estimated based on the constructed linkage map and B73  
629 reference genome (version 2).

630

### 631 **Estimating the relative divergence time between temperate and tropical lines**

632 Assuming a time scale of teosinte/maize divergence of about 10,000 years, an  
633  $F_{ST}$ -based approach (Schlebusch et al. 2012) was used to estimate a relative divergence  
634 time between temperate and tropical subpopulations, under the assumptions of no  
635 genetic drift, no change in effective population size, and equal generation times in each  
636 lineage. Although violations of these assumptions are probable and may reduce the  
637 accuracy of the estimated divergence times, the estimated divergence times will still be  
638 useful for the purposes of this study and in the general study of maize evolution. We  
639 combined our SNP data with the maize HapMapII (Chia et al. 2012) data and retained  
640 all the SNPs from teosinte (Chia et al. 2012) and maize with the same loci, consistent  
641 alleles, and missing ratio of alleles less than 20% to calculate  $F_{st}$  between temperate  
642 maize (TEM) and teosinte (TEO, 0.0668), and between TEM and tropical/subtropical  
643 maize (TST, 0.0453). Divergence time (T, measured in units of  $2Ne$  generations where  
644  $Ne$  is the effective number of diploid individuals) was calculated using  $F_{st}$  as according  
645 to the following formula (Schlebusch et al. 2012):

$$T = -\log (1 - F_{st})$$

646 Most of the SNP genotypes were located within expressed sequences, but the results  
647 should not be affected by this, assuming similar biases between the two comparisons  
648 and sufficient numbers of markers to smooth out unequal biases due to potential

649 unequal selection pressures on some loci. Different models were proposed to improve  
650 estimation of the relative divergence time. Assuming the teosinte lines from which we  
651 extracted SNPs were indeed the primitive ancestors (or contained the same sequence  
652 diversity within them as the actual ancestors), then  $T_{TEM-TEO} = 10,000 \text{ years}$ ; (Fig.  
653 2A) and we can calculate the divergence time between TEM and TST using the  
654 following formula:

$$T_{TEM-TST}/T_{TEM-TEO} = -\log(1 - Fst_{TEM-TST})/(-\log(1 - Fst_{TEM-TEO}))$$

655

656 This resulted in a divergence time of  $T_{TEM-TST}=6,700 \text{ years BP}$ . Assuming further that  
657 the teosinte lines have undergone a similar selection pressure (Fig. 2B), the analogical  
658 formula can be used to calculate  $T_{TEM-TST}$  divergence time as 3,400 years BP.  
659 However, because it is more likely that the teosinte lines have experienced a selection  
660 level that is not as strong as that of the adaptation process (Fig. 2C), the true  
661 divergence time of adaptation would fall between the two estimated times. Bioclimatic  
662 variables data from WORLDCLIM database (Hijmans et al. 2005) and the DIVA-GIS  
663 (Hijmans et al. 2012) software was used to map the stress (annual mean temperature)  
664 faced by maize during the adaptation process (Fig. 2D).

665

### 666 **Analysis of directional selection of phenomic divergence**

667  $Q_{ST} - F_{ST}$  comparison provide us with a method to distinguish population  
668 differentiation of complex polygenic traits as having been caused by natural selection  
669 or by genetic drift (Leinonen et al. 2013).  $Q_{ST}$  was estimated for all phenomic traits  
670 including expression traits as follows:

$$Q_{ST} = \sigma_{GB}^2 / (\sigma_{GB}^2 + 2\sigma_{GW}^2)$$

671 Where  $\sigma_{GB}^2$  refers to the genetic component of variance among subpopulations, and  
672  $\sigma_{GW}^2$  is the average component of variance within each subpopulation.

673 To accurately estimate the distribution of mean  $F_{ST}$  among tropical and temperate  
674 subpopulations, 10,000 SNPs were chosen randomly from the entire SNP data set and  
675 the calculation was repeated 1,000 times (Supplemental Fig. S14). By applying a strict  
676 outlier definition, we employed a 99% confidence interval (0.025~0.0273) for the  $F_{ST}$   
677 distribution, ensuring a more correct comparison of  $Q_{ST}-F_{ST}$ . A  $Q_{ST}>F_{ST}$  value was  
678 regarded as proof of trait divergence outstripping the expectation of a neutral state and  
679 thus of a strong directional selection signal (Leinonen et al. 2013).

680

### 681 **Differential expression analysis**

682 Cyber-T (Baldi and Long 2001), a regularized t-test method that also contains  
683 statistical inferences on experiment-wide false positive and negative levels based on  
684 the modeling of p-value distributions, was used on normalized expression data (Fu et al.  
685 2013) for the identification of statistically significant differentially expressed genes.  
686 Posterior Probability of Differential Expression (PPDE)  $\geq 0.9999$  was determined to  
687 identify differentially expressed (DE) genes in our study.

688

### 689 **Characterization of genes displaying altered expression conservation**

690 To identify which genes show Altered Expression Conservation (AEC), a statistic  
691 which reflects the co-expression of genes in a gene network (Swanson-Wagner et al.  
692 2012), the expression data was divided into 2 matrices ( $E^{tst}$  and  $E^{tem}$ ) based on  
693 adaptation (tropical and temperate) and a co-expression network was created for each  
694 matrix ( $R_{ij}^{tst}$  and  $R_{ij}^{tem}$ ). The hmisc package in R (Harrell 2012) was used to calculate  
695 the Pearson correlation coefficient between each pair of gene expression values within  
696 each subset, (TEM or TST). Hmisc is an efficient algorithm for calculations in very  
697 large data sets, and is calculated as:

$$R_{ij}^{tst} = PCC(E_i^{tst}, E_j^{tst})$$

$$R_{ij}^{tem} = PCC(E_i^{tem}, E_j^{tem})$$

698 for  $i, j = 1, \dots, 28,769$ . Thus,  $R_{ij}^{tst}$  and  $R_{ij}^{tem}$  are square matrices with the same  
699 dimensions ( $28,769 \times 28,769$ ). Each value in the two matrices represents an edge  
700 weight in the co-expression network and is the measured similarity between expression  
701 profiles of paired genes. Although the two matrices have identical dimensions, the  
702 distribution of values in each matrix may differ because of unequal sample sizes. Thus,  
703 to compare the two co-expression networks more accurately, the distributions were  
704 normalized by subtracting the mean and dividing by the SD to obtain a standard  
705 normal distribution. An expression conservation (EC) score was calculated as the  
706 Pearson correlation coefficient between gene profiles in the two co-expression  
707 networks as described by Swanson-Wagner *et al.* (2012):

$$EC = PCC(E_i^{tem}, E_i^{tst})$$

708 Where  $E_i^{tem}$  and  $E_i^{tst}$  were represented by the i-th rows in the temperate and tropical  
709 co-expression matrices, respectively. AEC genes were selected using a z score  
710 (Swanson-Wagner et al. 2012) to calculate each EC value as follows:

$$z = \frac{EC - \mu}{\sigma}$$

711 Where  $\mu$  and  $\sigma$  were the mean and SD of all the gene's EC scores. The z score cutoff  
712 of altered expression conservation values of genes was set at  $\leq -2.5$ . The software  
713 Circos (Krzywinski et al. 2009) was used for visualizing the results in a circular layout.

714

#### 715 **Candidate gene annotation and GO enrichment analysis**

716 To more fully explore candidate genes' functions, the annotation resources of  
717 maizeGDB (Lawrence et al. 2008) and the InterPro (Zdobnov and Apweiler 2001)  
718 database were integrated into the analyses. Gene Ontology (GO) enrichment analysis  
719 was maintained by AgriGO (Du et al. 2010) with the Fisher statistical test method ( $P$   
720  $\leq 0.05$ ) and Yekutieli multi-test adjustment method ( $FDR \leq 0.05$ ). The GOSlimViewer  
721 of AgBase (McCarthy 2006) was used to implement GO slim analysis, and the updated  
722 GO items of the maize genome were downloaded from Ensembl BioMart (Kinsella et  
723 al. 2011) on April 4th, 2013.

724

#### 725 **Association and QTL mapping analysis**

726 SNPs within regions that have experienced selection according to the XP-CLR  
727 approach (24,595 in total) were used in an association analysis with the 111 different  
728 traits using the software package GAPIT (Lipka et al. 2012) and a compressed mixed  
729 linear model. The cutoff for significance for associations was set at  $1/n$  ( $n$  is the  
730 number of SNPs used,  $p < 4.06E-05$ ). To better compare trait-SNP GWAS results with  
731 the genes identified following DE analysis, the DE identified genes were transformed  
732 prior to analysis into a discontinuous pseudo genotype with two alleles, one if  
733 expression of the gene for a given line was higher than the median of all lines, and the  
734 other if it was lower. Three recombinant inbred line (RIL) populations were used to  
735 map QTL: BY population: BK (an inbred selected from a tropical landrace with very



736 big kernel size) × Yu87-1 (an elite inbred with tropical background used frequently in  
737 Chinese breeding programs), SZ population: SK (an inbred selected from a tropical  
738 landrace with very small kernel size) × Zheng58 (an elite inbred used frequently in  
739 Chinese breeding programs), and YZ population: Yu87-1 (an elite inbred with tropical  
740 background used frequently in Chinese breeding programs) × Zong3 (an elite inbred  
741 used frequently in Chinese breeding programs). The QTL were mapped for three  
742 flowering times traits: days to tasseling (DTT), measured as the number of days from  
743 planting to 50% male flower appearance; days to silking (DTS) or the number of days  
744 from planting to 50% female flower appearance; and days to anthesis (DTA), the  
745 number of days from planting to 50% male flower pollen shed. Mapping was done  
746 using WinQTLcart (Wang et al. 2011) and a LOD threshold value for significance set  
747 to 2.5. The flowering time traits are an indication of adaptation and thus used as a  
748 proxy for that trait.

749

#### 750 **Comparison with DE gene sets from other tissues**

751 Li et al. (Li et al. 2013) conducted RNA-seq on the shoot apex from 2-wk-old  
752 seedlings of the NAM founders. We downloaded the raw data and quantified with the  
753 same procedure used in the present study (Fu et al. 2013) and average expression level  
754 of the two runs of each line was used. The third leaf (L3) after germination of the  
755 NAM founders was also RNA-sequenced by the Springer laboratory, and the RPKM  
756 results were obtained by the author (Eichten et al. 2013). These two studies provided  
757 different tissues and different genetic backgrounds compared to the current study; these  
758 were used to test if genes identified with differential expression in the current study are  
759 tissue-specific or if, as assumed in the current study, will prove to have lasting effects  
760 during maize development and maturity. Furthermore, consistency of expression  
761 differences in different populations can be validated. Genes with zero mapped reads in  
762 more than 60% of the inbred lines were excluded and the overall distribution of  
763 expression levels for each remaining gene was normalized using the normal quantile  
764 transformation (Fu et al. 2013). Lines with unmixed temperate (NSS+SS) and tropical  
765 backgrounds were used to call DE genes (P value < 0.05) with the same method (Fu et  
766 al. 2013). To test if the number of overlapping DE genes (Supplemental Fig. S3) is  
767 significant between the current study and the two published experiments, random  
768 subsamples of genes were chosen from each comparison pair (using same the number  
769 for each subset as the number of DE genes identified by each study); this simulation



770 was repeated 10,000 times to create a distribution of random overlap DE comparisons  
771 (Supplemental Fig. S3). This distribution was used to test if the observed number of  
772 DE overlaps is in accordance with the simulated normal distribution.  
773

774 **Data access**

775 There is no newly generated data in this study. All the data used in this study were  
776 published previously, and can be found in the Methods section.

777

778 **Acknowledgements**

779 We appreciate the helpful comments on the manuscript from Dr. Major M. Goodman,  
780 and Dr. Nathan M. Springer for providing normalized RPKM expression dataset. We  
781 thank the students and colleagues from J. Yan's present laboratory as well as his former  
782 laboratory at the China Agricultural University; and the X. Yang and J. Li laboratory at  
783 the China Agricultural University for collection of phenotypic data. We thank Dr. C.  
784 Bedoya for references on archeological studies in Mexico. This research was supported  
785 by the National Natural Science Foundation of China (31123009, 31222041), the  
786 National Basic Research and Development Program of China (2011CB100105), the  
787 National Hi-Tech Research and Development Program of China (2012AA10A307) and  
788 the Fundamental Research Funds for the Central Universities (Program No.2013SC01).

789

790 **Author contributions**

791 J.Y. designed and supervised this study. H.L., X.W., W.W., J.L., M.D., H.T., and Q.P.  
792 performed the experiments. H.L., X.W. and M.J. performed the data analysis. X.Y. and  
793 X. D. contributed new protocols. H.L., X.W., M.L.W. and J.Y. prepared the  
794 manuscript, and all the authors critically read and approved the manuscript.

795

796

797 **Disclosure declaration**

798 The authors declare no conflicts of interest.

799

800

801 **TABLE LEGEND**

802 Table 1. Summary of SNP-trait and expression-trait association studies

803

804

805 **FIGURE LEGENDS**

806 Figure 1. Integrated results of genome-selection (XP-CLR), transcriptome analysis (DE  
807 and AEC) and QTL mapping. ① Ten chromosomes of maize. ② XP-CLR value: the  
808 top 20% are marked in red, and the bottom 80% in grey. ③ QTL mapping results for  
809 days to silking (DTS, red), days to tasseling (DTT, green) and days to anthesis (DTA,  
810 blue). ④ Results of DE and AEC. Red and blue boxes indicate up- and  
811 down-regulated genes in temperate maize (TEM) relative to tropical (TST),  
812 respectively; green boxes indicate AEC genes. Some of the larger boxes are genes  
813 referred to in the text.

814

815 Figure 2. Maize dispersion map and divergence time estimations. (A) Divergence time  
816 (T) was estimated between temperate (TEM) and tropical/subtropical (TST) maize,  
817 using extant teosinte (TEO) lines as the ancestor of maize. (B) Divergence time (T)  
818 was estimated using a model supposing a common ancestor to TEM, TST, and TEO  
819 and equal selection pressure on extant TEO lines (leading to T' for teosinte) as on TST  
820 and TEM. (C) Divergence time was estimated between (A) and (B), with the more  
821 likely assumption that TEO lines have experienced a lower level of selection pressure  
822 (and smaller T') than the intensity faced by TEM and TST during the adaptation  
823 process. (D) Maize dispersion map showing environmental difference in annual mean  
824 temperature. Arrows show possible dispersion routes and the numbers beside the routes  
825 indicate the likely time (in years before present) when the dispersion happened, and the  
826 circle (beside a silver star) is the center of maize domestication (Hufford et al. 2012).  
827 Even though there are no inbred lines from South America, the dispersion route to  
828 South America was inferred from a previous study (Wallace et al. 2014).

829

830 Figure 3. Examples of validation of the function of genes within selected genomic  
831 regions, using GWAS, QTL mapping, and gene annotations. (A) Gene  
832 GRMZM2G360455 was in a selected region on chromosome 5. (B) The region which  
833 contained GRMZM2G360455 covered a QTL for days to silking (DTS). (C)

834 Annotation of GRMZM2G360455 disclosed a CCT domain in this gene which is  
835 related to flowering time. **(D)** GRMZM2G095043 was in the selected region on  
836 chromosome 1. **(E)** GRMZM2G095043 was strongly associated with cob color and  
837 naringenin, which is upstream of the anthocyanin and maysin pathways, and causes  
838 changes in cob color. **(F)**. Annotation of GRMZM2G095043 indicates that it contains a  
839 WD40 domain which could control multiple enzymatic steps in the flavonoid pathway.

840

841 Figure 4. Transcriptional differential expression analysis. **(A)** Density plots for the  
842 coefficient of variance (COV) for gene expression levels in all lines (black), temperate  
843 lines (blue), and tropical lines (red). **(B)** Genes with significantly different expression  
844 were used for hierarchical clustering. **(C)** Enrichment analysis of GO annotation within  
845 up-regulated genes in temperate lines relative to tropical lines. **(D)** Enrichment analysis  
846 of GO annotation of down-regulated genes in temperate lines relative to tropical lines.  
847 Within the specific GO terms in **(C)** and **(D)**, MF represents genes of molecular  
848 function, CC represents genes with a cellular component, and BP are genes associated  
849 with biological processes.

850

851 Figure 5. Cob color was influenced by the flavonoid biosynthetic pathway in maize. **(A)**  
852 A simplified flavonoid biosynthetic pathway. Genes in red were found to be associated  
853 with cob color in this study. **(B)**. Genes involved in the flavonoid pathway showed  
854 significantly differential expression between temperate and tropical groups. **(C)**. Three  
855 DE genes (*c2* (GRMZG2G422750), *pr1* (GRMZG2G025832), *al* (GRMZG2G026930))  
856 had significant association with cob color.

857

858

859 **Reference**

- 860 Ahmad A, Zhang Y, Cao X-F. 2010. Decoding the epigenetic language of plant  
861 development. *Mol plant* **3**(4): 719-728.
- 862 Antão CM, Malcata FX. 2005. Plant serine proteases: biochemical, physiological and  
863 molecular features. *Plant Physiol Bioch* **43**(7): 637-650.
- 864 Baldi P, Long AD. 2001. A bayesian framework for the analysis of microarray  
865 expression data: regularized t-test and statistical inferences of gene changes.  
866 *Bioinfor* **17**: 509-519.
- 867 Beatty MK, Rahman A, Cao H, Woodman W, Lee M, Myers AM, James MG. 1999.  
868 Purification and molecular genetic characterization of ZPU1, a pullulanase-type  
869 starch-debranching enzyme from maize. *Plant Physiol* **119**(1): 255-266.
- 870 Bhargava S, Sawant K. 2013. Drought stress adaptation: metabolic adjustment and  
871 regulation of gene expression. *Plant Breeding* **132**(1): 21-32.
- 872 Blake M. 2006. Dating the initial spread of *Zea mays*. *Histories of maize:  
873 multidisciplinary approaches to the prehistory, linguistics, biogeography,  
874 domestication and evolution of maize Amsterdam*, PP 55-72. Elsevier.
- 875 Bohnert HJ, Sheveleva E. 1998. Plant stress adaptations-making metabolism move.  
876 *Curr Opin Plant Biol* **1**(3): 267-274.
- 877 Buckler ES, Holland JB, Bradbury PJ, Acharya CB, Brown PJ, Browne C, Ersoz  
878 E, Flint-Garcia S, Garcia A, Glaubitz JC, Goodman MM, Harjes C, Guill  
879 K, Kroon DE, Larsson S, Lepak NK, Li H, Mitchell SE, Pressoir G, Peiffer  
880 JA, Rosas MO, Rocheford TR, Romay MC, Romero S, Salvo S, Sanchez  
881 Villeda H, da Silva HS, Sun Q, Tian F, Upadyayula N, Ware D, Yates H, Yu  
882 J, Zhang Z, Kresovich S, McMullen MD. 2009. The genetic architecture of  
883 maize flowering time. *Science*. 325(5941):714-8
- 884 Carroll SB. 2008. Evo-devo and an expanding evolutionary synthesis: a genetic theory  
885 of morphological evolution. *Cell* **134**(1): 25-36.
- 886 Chander S, Guo YQ, Yang XH, Zhang J, Lu XQ, Yan JB, Song TM, Rocheford TR, Li  
887 JS. 2008. Using molecular markers to identify two major loci controlling  
888 carotenoid contents in maize grain. *Theor Appl Genet* **116**, 223-233.
- 889 Chen H, Patterson N, Reich D. 2010. Population differentiation as a test for selective  
890 sweeps. *Genome Res* **20**(3): 393-402.
- 891 Chen ZJ. 2007. Genetic and epigenetic mechanisms for gene expression and  
892 phenotypic variation in plant polyploids. *Annu Rev Plant Biol* **58**: 377.
- 893 Chia J-M, Song C, Bradbury PJ, Costich D, de Leon N, Doebley J, Elshire RJ, Gaut B,  
894 Geller L, Glaubitz JC. 2012. Maize HapMap2 identifies extant variation from a  
895 genome in flux. *Nat Genet* **44**(7): 803-807.
- 896 Cho J-N, Ryu J-Y, Jeong Y-M, Park J, Song J-J, Amasino RM, Noh B, Noh Y-S. 2012.  
897 Control of seed germination by light-induced histone arginine demethylation  
898 activity. *Dev cell* **22**(4): 736-748.
- 899 Cho Y, Fernandes J, Kim S-H, Walbot V. 2002. Gene-expression profile comparisons  
900 distinguish seven organs of maize. *Genome Biol* **3**(9): research0045.
- 901 Cockram J, Thiel T, Steuernagel B, Stein N, Taudien S, Bailey PC, O'Sullivan DM.  
902 2012. Genome dynamics explain the evolution of flowering time CCT domain

- 903 gene families in the Poaceae. *PloS One* **7**(9): e45307.
- 904 Cortessis VK, Thomas DC, Levine AJ, Breton CV, Mack TM, Siegmund KD, Haile  
905 RW, Laird PW. 2012. Environmental epigenetics: prospects for studying  
906 epigenetic mediation of exposure–response relationships. *Hum Genet* **131**(10):  
907 1565-1589.
- 908 De Casas RR, Kovach K, Dittmar E, Barua D, Barco B, Donohue K. 2012. Seed after-  
909 ripening and dormancy determine adult life history independently of  
910 germination timing. *New Phytologist* **194**(3): 868-879.
- 911 Dharmasiri N, Dharmasiri S, Estelle M. 2005. The F-box protein TIR1 is an auxin  
912 receptor. *Nature* **435**(7041): 441-445.
- 913 Dharmasiri S, Jayaweera T, Dharmasiri N. 2013. Plant Hormone Signalling: Current  
914 Perspectives on Perception and Mechanisms of Action. *Ceyl J Sci Biol* **42**(1):  
915 1-17.
- 916 Doebley JF, Gaut BS, Smith BD. 2006. The molecular genetics of crop domestication.  
917 *Cell* **127**(7): 1309-1321.
- 918 Du Z, Zhou X, Ling Y, Zhang ZH, Su Z. 2010. agriGO: a GO analysis toolkit for the  
919 agricultural community. *Nucl Acids Res* **38**: 64-70.
- 920 Dubreuil-Maurizi C, Poinssot B. 2012. Role of glutathione in plant signaling under  
921 biotic stress. *Plant Signal Behav* **7**(2): 210-212.
- 922 Ducrocq S, Madur D, Veyrieras J-B, Camus-Kulandaivelu L, Kloiber-Maitz M,  
923 Presterl T, Ouzunova M, Manicacci D, Charcosset A. 2008. Key impact of  
924 Vgt1 on flowering time adaptation in maize: evidence from association  
925 mapping and ecogeographical information. *Genetics* **178**(4): 2433-2437.
- 926 Eastmond PJ. 2006. SUGAR-DEPENDENT1 encodes a patatin domain triacylglycerol  
927 lipase that initiates storage oil breakdown in germinating Arabidopsis seeds.  
928 *Plant Cell* **18**(3): 665-675.
- 929 Ecker JR, Bickmore WA, Barroso I, Pritchard JK, Gilad Y, Segal E. 2012. Genomics:  
930 ENCODE explained. *Nature* **489**(7414): 52-55.
- 931 Eichten SR, Briskine R, Song J, Li Q, Swanson-Wagner R, Hermanson PJ, Waters AJ,  
932 Starr E, West PT, Tiffin P. 2013. Epigenetic and genetic influences on DNA  
933 methylation variation in maize populations. *Plant Cell* **25**(8): 2783-2797.
- 934 Falcone-Ferreira ML, Rius SP, Casati P. 2011. Flavonoids: biosynthesis, biological  
935 functions, and biotechnological applications. *Front Plant Sci* **3**: 222-222.
- 936 Fraser HB. 2013. Gene expression drives local adaptation in humans. *Genome*  
937 *research* **23**(7): 1089-1096.
- 938 Fu J, Cheng Y, Linghu J, Yang X, Kang L, Zhang Z, Zhang J, He C, Du X, Peng Z.  
939 2013. RNA sequencing reveals the complex regulatory network in maize kernel.  
940 *Nat Commun* **4**, 2832-2844.
- 941 Ganai MW, Durstewitz G, Polley A, Bérard A, Buckler ES, Charcosset A, Clarke JD,  
942 Graner E, Hansen M, Joets J. 2011. A Large Maize (*Zea mays* L.) SNP  
943 Genotyping Array: Development and Germplasm Genotyping, and Genetic  
944 Mapping to Compare with the B73 Reference Genome. *PLoS One* **6**: e28334.
- 945 Griffiths S, Dunford RP, Coupland G, Laurie DA. 2003. The evolution of

- 946           CONSTANS-like gene families in barley, rice, and Arabidopsis. *Plant Physiol*  
947           **131**(4): 1855-1867.
- 948 Grobman A, Bonavia D, Dillehay TD, Piperno DR, Iriarte J, Holst I. 2012. Pre-ceramic  
949 maize from Paredones and Huaca Prieta, Peru. *Proc Natl Acad Sci USA* **109**(5):  
950 1755-1759.
- 951 Gross BL, Olsen KM. 2010. Genetic perspectives on crop domestication. *Trends Plant*  
952 *Sci* **15**(9): 529-537.
- 953 Grossniklaus U, Kelly WG, Ferguson-Smith AC, Pembrey M, Lindquist S. 2013.  
954 Transgenerational epigenetic inheritance: how important is it? *Nat Rev Genet*  
955 **14**(3): 228-235.
- 956 Haas J, Creamer W, Mesía LH, Goldstein D, Reinhard K, Rodríguez CV. 2013.  
957 Evidence for maize (*Zea mays*) in the Late Archaic (3000–1800 BC) in the  
958 Norte Chico region of Peru. *Proc Natl Acad Sci USA* **110**(13): 4945-4949.
- 959 Harrell FE. 2012. Hmisc: Harrell Miscellaneous.  
960 <http://CRAN.R-project.org/package=Hmisc>.
- 961 Hijmans RJ, Cameron SE, Parra JL, Jones PG, Jarvis A. 2005. Very high resolution  
962 interpolated climate surfaces for global land areas. *Int J Climatol* **25**  
963 1965-1978.
- 964 Hijmans RJ, Guarino L, Mathur P. 2012. DIVA-GIS is a free computer program for  
965 mapping and geographic data analysis. Manual available at  
966 <http://www.diva-gis.org>.
- 967 Hufford MB, Lubinsky P, Pyhäjärvi T, Devengenzo MT, Ellstrand NC, Ross-Ibarra J.  
968 2013. The genomic signature of crop-wild introgression in maize. *PLoS Genet*  
969 **9**(5): e1003477.
- 970 Hufford MB, Xu X, Van Heerwaarden J, Pyhäjärvi T, Chia J-M, Cartwright RA,  
971 Elshire RJ, Glaubitz JC, Guill KE, Kaeppeler SM. 2012. Comparative  
972 population genomics of maize domestication and improvement. *Nat Genet* **44**(7):  
973 808-811.
- 974 Jackson D, Hake S. 1999. Control of phyllotaxy in maize by the *abp11* gene.  
975 *Development* **126**(2): 315-323.
- 976 James MG, Robertson DS, Myers AM. 1995. Characterization of the maize gene  
977 *sugary1*, a determinant of starch composition in kernels. *Plant Cell* **7**(4):  
978 417-429.
- 979 Jia F, Wu B, Li H, Huang J, Zheng C. 2013. Genome-wide identification and  
980 characterisation of F-box family in maize. *Mol Genet Genom* **288**(11): 559-577.
- 981 Kapazoglou A, Drosou V, Argiriou A, Tsiftaris AS. 2013. The study of a barley  
982 epigenetic regulator, HvDME, in seed development and under drought. *BMC*  
983 *plant biol* **13**(1): 172.
- 984 Karlsson K, Sharma H, Nyberg F. 2006. Chromatographic characterization of  
985 substance P endopeptidase in the rat brain reveals affected enzyme activity  
986 following heat stress. *Biom Chrom* **20**(1): 77-82.
- 987 Kepinski S, Leyser O. 2005. The Arabidopsis F-box protein TIR1 is an auxin receptor.  
988 *Nature* **435**(7041): 446-451.
- 989 Khanna R, Kikis EA, Quail PH. 2003. EARLY FLOWERING 4 functions in



- 990 phytochrome B-regulated seedling de-etiolation. *Plant Physiol* **133**(4):  
991 1530-1538.
- 992 Kinsella RJ, Kähäri A, Haider S, Zamora J, Proctor G, Spudich G, Almeida-King J,  
993 Staines D, Derwent P, Kerhornou A. 2011. Ensembl BioMarts: a hub for data  
994 retrieval across taxonomic space. Database (Oxford).  
995 Doi:10.1093/database/bar030.
- 996 Koenig D, Jiménez-Gómez JM, Kimura S, Fulop D, Chitwood DH, Headland LR,  
997 Kumar R, Covington MF, Devisetty UK, Tat AV. 2013. Comparative  
998 transcriptomics reveals patterns of selection in domesticated and wild tomato.  
999 *Proc Natl Acad Sci USA* **110**(28): E2655-E2662.
- 1000 Koes R, Verweij W, Quattrocchio F. 2005. Flavonoids: a colorful model for the  
1001 regulation and evolution of biochemical pathways. *Trends Plant Sci* **10**(5):  
1002 236-242.
- 1003 Kolmos E, Schoof H, Plümer M, Davis SJ. 2008. Structural insights into the function  
1004 of the core-circadian factor TIMING OF CAB2 EXPRESSION 1 (TOC1). *J*  
1005 *Cir Rhy* **6**(1): 3.
- 1006 Koops P, Pelsler S, Ignatz M, Klose C, Marrocco-Selden K, Kretsch T. 2011. EDL3 is  
1007 an F-box protein involved in the regulation of abscisic acid signalling in  
1008 *Arabidopsis thaliana*. *J Expl Bot* **62**(15): 5547-5560.
- 1009 Krzywinski M, Schein J, Birol I, Connors J, Gascoyne R, Horsman D, Jones SJ, Marra  
1010 MA. 2009. Circos: an Information aesthetic for comparative genomics. *Genome*  
1011 *Res* **19**, 1639-1645.
- 1012 Lawrence CJ, Harper LC, Schaeffer ML, Sen TZ, Seigfried TE, Campbell DA. 2008.  
1013 MaizeGDB: The maize model organism database for basic, translational, and  
1014 applied research. *Int J Plant Genomics*, 1-10.
- 1015 Leinonen T, McCairns RS, O'Hara RB, Merilä J. 2013. QST–FST comparisons:  
1016 evolutionary and ecological insights from genomic heterogeneity. *Nat Rev*  
1017 *Genet* **14**(3): 179-190.
- 1018 Li H, Peng Z, Yang X, Wang W, Fu J, Wang J, Han Y, Chai Y, Guo T, Yang N. 2013.  
1019 Genome-wide association study dissects the genetic architecture of oil  
1020 biosynthesis in maize kernels. *Nat Genet* **45**(1): 43-50.
- 1021 Li X, Zhu C, Yeh C-T, Wu W, Takacs EM, Petsch KA, Tian F, Bai G, Buckler ES,  
1022 Muehlbauer GJ. 2012. Genic and nongenic contributions to natural variation of  
1023 quantitative traits in maize. *Genome Res* **22**(12): 2436-2444.
- 1024 Lipka AE, Tian F, Wang Q, Peiffer J, Li M, Bradbury PJ, Gore MA, Buckler ES,  
1025 Zhang Z. 2012. GAPIT: genome association and prediction integrated tool.  
1026 *Bioinfor* **28**: 2397-2399.
- 1027 Matsuoka Y, Vigouroux Y, Goodman MM, Sanchez J, Buckler E, Doebley J. 2002. A  
1028 single domestication for maize shown by multilocus microsatellite genotyping.  
1029 *Proc Natl Acad Sci USA* **99**(9): 6080-6084.
- 1030 McCarthy FM. 2006 AgBase: a functional genomics resource for agriculture. *BMC*  
1031 *Genomics* **7**: 229.
- 1032 McMullen MD, Frey M, Degenhardt J. 2009. Genetics and biochemistry of insect  
1033 resistance in maize. In *Handbook of maize: Its biology*, pp. 271-289. Springer,



- 1034 New York.
- 1035 Nei M. 1977. F-statistics and analysis of gene diversity in subdivided populations.  
1036 *Ann. Hum Genet* **41**: 225-233.
- 1037 País SM, Téllez-Iñón MT, Capiati DA. 2009. Serine/threonine protein phosphatases  
1038 type 2A and their roles in stress signaling. *Plant Signal Behav* **4**(11):  
1039 1013-1015.
- 1040 Patterson N, Price AL, Reich D. 2006. Population structure and Eigenanalysis. *PLoS*  
1041 *Genet* **2**: e190.
- 1042 Pavlidis P, Jensen JD, Stephan W, Stamatakis A. 2012. A critical assessment of  
1043 storytelling: gene ontology categories and the importance of validating genomic  
1044 scans. *Mol Biol Evol* **29**(10): 3237-3248.
- 1045 Piperno DR, Pearsall DM. 1998. Origins of agriculture in the lowland neotropics.
- 1046 Price AL, Patterson NJ, Plenge RM, Weinblatt ME, Shadick NA, Reich D. 2006.  
1047 Principal components analysis corrects for stratification in genome-wide  
1048 association studies. *Nat Genet* **38**: 904-909.
- 1049 Pritchard JK, Stephens M, Donnelly P. 2000. Inference of population structure using  
1050 multilocus genotype data. *Genetics* **155**: 945-959.
- 1051 Ptashne M. 2007. On the use of the word 'epigenetic'. *Curr Biol* **17**(7): 233-236.
- 1052 Richen C, Xiting Z, Junping G. 2003. Effect of Water Deficit Stress on Endopeptidase  
1053 Activity in Petals of Cut Rose Belami'. *Acta Hort Sin* **30**(3): 352-354.
- 1054 Rideout W, Coetzee GA, Olumi AF, Jones PA. 1990. 5-Methylcytosine as an  
1055 endogenous mutagen in the human LDL receptor and p53 genes. *Science*  
1056 **249**(4974): 1288-1290.
- 1057 Schlebusch CM, Skoglund P, Sjödin P, Gattepaille LM, Hernandez D, Jay F, Li S,  
1058 Jongh MD, Singleton A, Blum MGB. 2012. Genomic variation in seven  
1059 Khoe-San groups reveals adaptation and complex African history. *Science* **338**,  
1060 374-379.
- 1061 Schuster-Böckler B, Lehner B. 2012. Chromatin organization is a major influence on  
1062 regional mutation rates in human cancer cells. *Nature* **488**: 504-507.
- 1063 Sekhon RS, Lin H, Childs KL, Hansey CN, Buell CR, de Leon N, Kaeppler SM. 2011.  
1064 Genome-wide atlas of transcription during maize development. *Plant J* **66**(4):  
1065 553-563.
- 1066 Sharma M, Chai C, Morohashi K, Grotewold E, Snook ME, Chopra S. 2012.  
1067 Expression of flavonoid 3'-hydroxylase is controlled by P1, the regulator of  
1068 3-deoxyflavonoid biosynthesis in maize. *BMC Plant Biol* **12**(1): 196.
- 1069 Shen H, Zhu L, Bu Q-Y, Huq E. 2012. MAX2 affects multiple hormones to promote  
1070 photomorphogenesis. *Mol Plant* **5**(3): 750-762.
- 1071 Song S, Dai X, Zhang W-H. 2012. A rice F-box gene, OsFbx352, is involved in  
1072 glucose-delayed seed germination in rice. *J Exp Bot* **63**(15): 5559-5568.
- 1073 Staller JE, Thompson RG. 2002. A multidisciplinary approach to understanding the  
1074 initial introduction of maize into coastal Ecuador. *J Arch Sci* **29**(1): 33-50.
- 1075 Swanson-Wagner R, Briskine R, Schaefer R, Hufford MB, Ross-Ibarra J, Myers CL,  
1076 Tiffin P, Springer NM. 2012. Reshaping of the maize transcriptome by

- 1077 domestication. *Proc Natl Acad Sci USA* **109**(29): 11878-11883.
- 1078 Tajima F. 1983. Evolutionary relationship of DNA sequences in finite populations.
- 1079 *Genetics* **105**: 437-460.
- 1080 Tollenaar M, Wu J. 1999. Yield improvement in temperate maize is attributable to
- 1081 greater stress tolerance. *Crop Sci* **39**(6): 1597-1604.
- 1082 USDA FAS: Circular Series: World cultural production.
- 1083 [<http://www.fas.usda.gov/psdonline/circulars/production.pdf> (2013)]
- 1084 Van Heerwaarden J, Doebley J, Briggs WH, Glaubitz JC, Goodman MM, Gonzalez
- 1085 JdJS, Ross-Ibarra J. 2011. Genetic signals of origin, spread, and introgression
- 1086 in a large sample of maize landraces. *Proc Natl Acad Sci USA* **108**(3):
- 1087 1088-1092.
- 1088 Wallace J, Larsson S, Buckler E. 2014. Entering the second century of maize
- 1089 quantitative genetics. *Heredity* **112**(1): 30-38.
- 1090 Wang S, Basten CJ, Zeng ZB. 2011. Windows QTL cartographer 2.5. Department of
- 1091 statistics, North Carolina State University, Raleigh, NC
- 1092 <http://statgen.ncsu.edu/qtldcart/WQTLCart.htm>.
- 1093 Wang Z, Gerstein M, Snyder M. 2009. RNA-Seq: a revolutionary tool for
- 1094 transcriptomics. *Nat Rev Genet* **10**(1): 57-63.
- 1095 Warburton ML, Wilkes G, Taba S, Charcosset A, Mir C, Dumas F, Madur D,
- 1096 Dreisigacker S, Bedoya C, Prasanna B. 2011. Gene flow among different
- 1097 teosinte taxa and into the domesticated maize gene pool. *Genet Resour Crop*
- 1098 *Evol* **58**(8): 1243-1261.
- 1099 Wickham H. 2009. ggplot2: elegant graphics for data analysis. Springer New York,
- 1100 ISBN 978-0-387-98140-6, <http://had.co.nz/ggplot2/book>.
- 1101 Wimmer V, Albrecht T, Auinger HJ, Schoen CC. 2012. Synbreed: a framework for the
- 1102 analysis of genomic prediction data using R. *Bioinform* **28**: 2086-2087.
- 1103 Wen W, Li D, Li X, Gao Y, Li W, Li H, Liu J, Liu H, Chen W, Luo J. 2014.
- 1104 Metabolome-based genome-wide association study of maize kernel leads to
- 1105 novel biochemical insights. *Nat Commun* **5**, 3438.
- 1106 Wolters H, Jürgens G. 2009. Survival of the flexible: hormonal growth control and
- 1107 adaptation in plant development. *Nat Rev Genet* **10**(5): 305-317.
- 1108 Xi W, Liu C, Hou X, Yu H. 2010. MOTHER OF FT AND TFL1 regulates seed
- 1109 germination through a negative feedback loop modulating ABA signaling in
- 1110 *Arabidopsis*. *Plant Cell* **22**(6): 1733-1748.
- 1111 Xu Z, Dooner HK. 2006. The maize aberrant pollen transmission 1 gene is a
- 1112 SABRE/KIP homolog required for pollen tube growth. *Genetics* **172**(2):
- 1113 1251-1261.
- 1114 Yan J, Shah T, Warburton ML, Buckler ES, McMullen MD, Crouch J. 2009. Genetic
- 1115 characterization and linkage disequilibrium estimation of a global maize
- 1116 collection using SNP markers. *PloS One* **4**: e8451.
- 1117 Yang X, Gao S, Xu S, Zhang Z, Prasanna BM, Li L, Li J, Yan J. 2011.
- 1118 Characterization of a global germplasm collection and its potential utilization
- 1119 for analysis of complex quantitative traits in maize. *Mol Breeding* **28**(4):
- 1120 511-526.

- 1121 Yoo SY, Kardailsky I, Lee JS, Weigel D, Ahn JH. 2004. Acceleration of Flowering by  
1122 Overexpression of MFT (MOTHER OF FT AND TFL1). *Mol Cells* **17**(1).  
1123 Zdobnov EM, Apweiler R. 2001. InterProScan - an integration platform for the  
1124 signature-recognition methods in InterPro. *Bioinform* **17**: 847-848.  
1125 Zhang H, Ogas J. 2009. An epigenetic perspective on developmental regulation of seed  
1126 genes. *Mol Plant* **2**(4): 610-627.  
1127 Zhang X, Colleoni C, Ratushna V, Sirghie-Colleoni M, James M, Myers A. 2004.  
1128 Molecular characterization demonstrates that the *Zea mays* gene sugary2 codes  
1129 for the starch synthase isoform SSIIa. *Plant mol Biol* **54**(6): 865-879.  
1130 Zhao Q, Weber AL, McMullen MD, Guill K, Doebley J. 2011. MADS-box genes of  
1131 maize: frequent targets of selection during domestication. *Genet Res* **93**(01):  
1132 65-75.

1133 **Table 1. Summary of SNP-trait and expression-trait association studies**

|               | Associated traits <sup>a</sup> | Agronomic traits | Amino acid traits | Metabolic traits | Related genes <sup>b</sup> |
|---------------|--------------------------------|------------------|-------------------|------------------|----------------------------|
| Genome        | 100                            | 3                | 1                 | 96               | 518                        |
| Transcriptome | 101                            | 6                | 5                 | 90               | 245                        |
| Overlapped    | 75                             | 3                | 1                 | 71               | 7                          |
| Total         | 126                            | 6                | 5                 | 115              | 756                        |

1134 <sup>a</sup> represents the divergent traits which were associated with varied markers (SNPs or DE genes)

1135 using genome wide association study (GWAS).

1136 <sup>b</sup> represents the closest genes (or within genes) of the significant associated markers.

1137

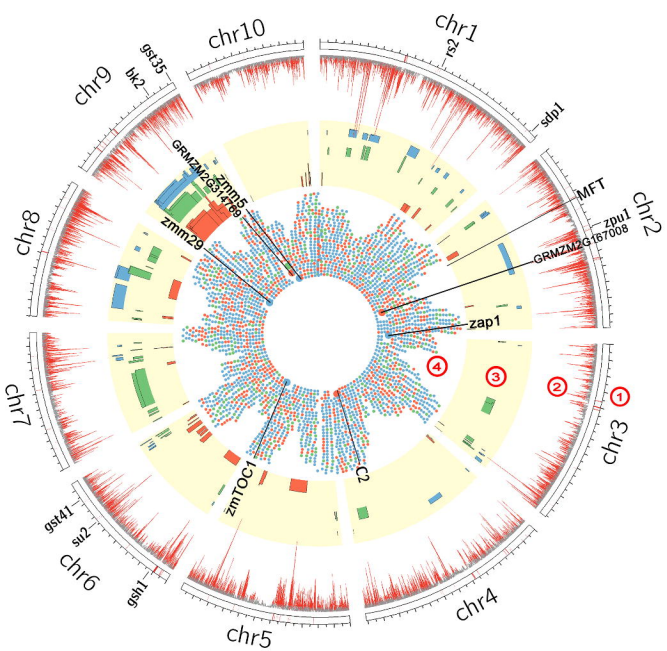

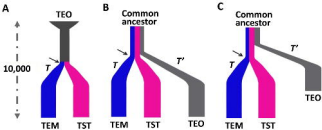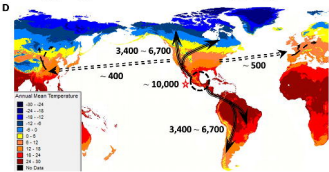

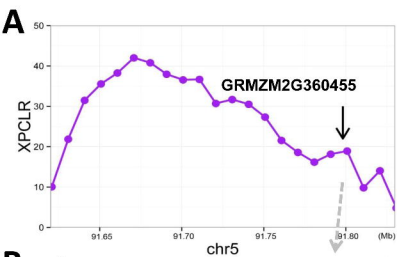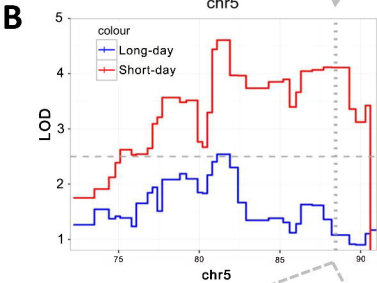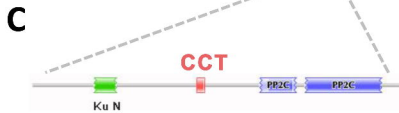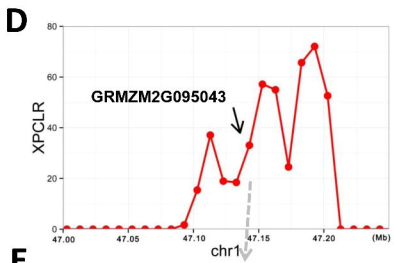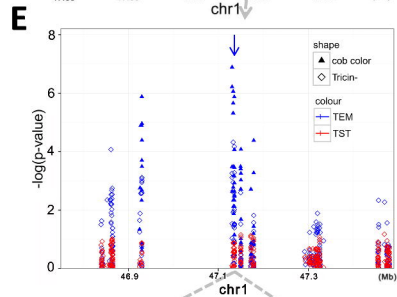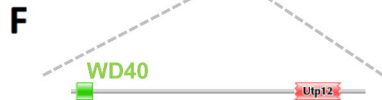

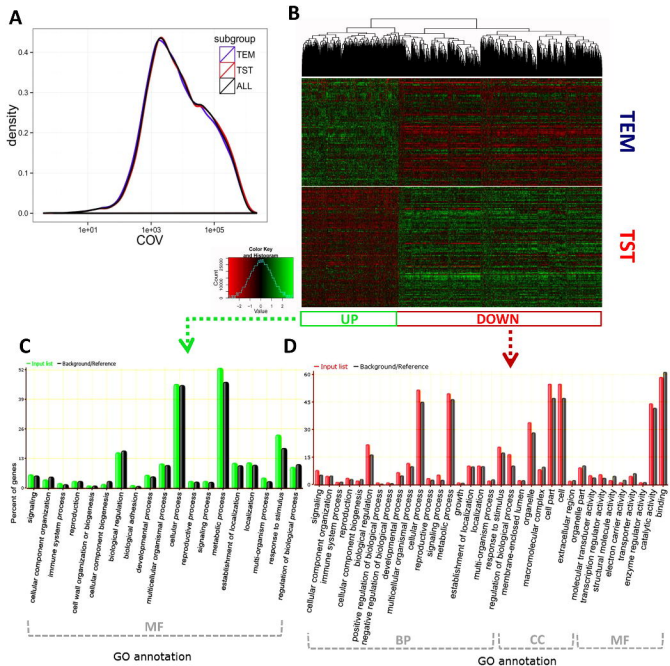



**A**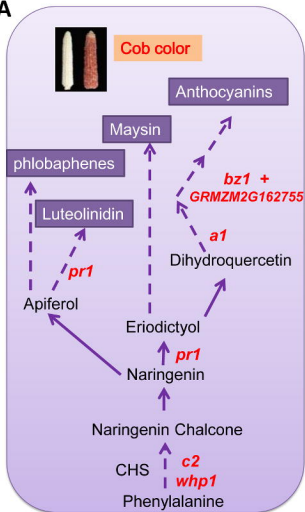**B**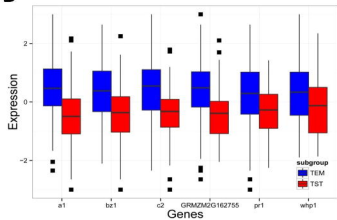**C**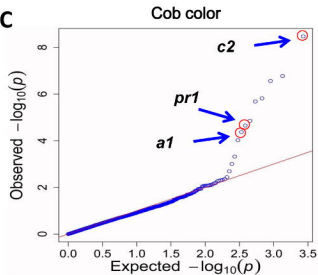

Source: http://biorxiv.org/content/10.1101/005751v1.full.pdf
